# Supplementary material for: Vascularisation in Deep Endometriosis: A Systematic Review with Narrative Outcomes
Source: MDPI journal article supplement (doi:10.3390/cells12091318), 2023-05-05
Supplement: s1 [file s1]

**Supplementary Table S1 – Search Strategy**

| Set | Search Statement                                                                                                                                                                                                                                                                                                                                                                                                                                                                                                                                                                                                                                                                                                                                                                                                                                                         |
|-----|--------------------------------------------------------------------------------------------------------------------------------------------------------------------------------------------------------------------------------------------------------------------------------------------------------------------------------------------------------------------------------------------------------------------------------------------------------------------------------------------------------------------------------------------------------------------------------------------------------------------------------------------------------------------------------------------------------------------------------------------------------------------------------------------------------------------------------------------------------------------------|
| 1   | (Deep Infiltrating Endometriosis or Deep Endometriosis or Bowel endometriosis or Colonic endometriosis or colon endometriosis or rectal endometriosis or rectovaginal endometriosis or rectal-vaginal endometriosis or (endometriosis and penetrating) or (Endometriosis and Deep) or (endometriosis and Rectum) or rectosigmoid endometriosis or Recto-Sigmoid endometriosis or (sigmoid and endometriosis)).mp. [mp=title, book title, abstract, original title, name of substance word, subject heading word, floating sub-heading word, keyword heading word, organism supplementary concept word, protocol supplementary concept word, rare disease supplementary concept word, unique identifier, synonyms, population supplementary concept word, anatomy supplementary concept word]                                                                             |
| 2   | (Vasculari*ation or Neovasculari*ation or Angiogenesis or "blood supply" or vasculogenesis or inosculation).mp. or Blood Vessels/ or Pathologic Neovascularization.mp. or (Neovascularization, Physiologic/ or Neovascularization, Pathologic/) or (Angiogenesis, Pathologic or Angiogenesis, Pathological or Angiogenesis, Physiologic or Angiogenesis, Physiological or Pathologic Angiogenesis or Pathological Angiogenesis or Physiologic Angiogenesis or Physiological Angiogenesis).mp. [mp=title, book title, abstract, original title, name of substance word, subject heading word, floating sub-heading word, keyword heading word, organism supplementary concept word, protocol supplementary concept word, rare disease supplementary concept word, unique identifier, synonyms, population supplementary concept word, anatomy supplementary concept word] |
| 3   | 1 and 2                                                                                                                                                                                                                                                                                                                                                                                                                                                                                                                                                                                                                                                                                                                                                                                                                                                                  |
